# Supplementary material for: A holistic comparison of flavor signature and chemical profile in different harvesting periods of Chrysanthemum morifolium Ramat. based on metabolomics combined with bioinformatics and molecular docking strategy
Source: Royal Society of Chemistry journal article supplement (doi:10.1039/d2ra05698d), 2022-01-01
Supplement: d2ra05698d1.pdf [file d2ra05698d1.pdf]

## Supplementary Materials

**Title: A holistic comparison on flavor signature and chemical profile in different harvesting periods of *Chrysanthemum morifolium* Ramat. based on metabolomics combined with bioinformatics analysis and molecular docking strategy**

Mengxin Yang<sup>a</sup>, Xi Tian<sup>a</sup>, MiaotingZhang<sup>a</sup>, jinhuanWei<sup>a</sup>, yukunNiu<sup>a</sup>, JialiHou<sup>a</sup>, YiranJin<sup>b\*\*</sup>, YingfengDu<sup>a\*</sup>

<sup>a</sup> Department of Pharmaceutical Analysis, School of Pharmacy, Hebei Medical University, Shijiazhuang, Hebei, 050017, P.R. China

<sup>b</sup> The Second Hospital of Hebei Medical University, Shijiazhuang, Hebei, 050000, P. R. China

\*Corresponding author

\*Yingfeng Du

Tel: +86-311-86265625; Fax: +86-311-86266419

E-mail address: yingfengdu@hotmail.com

\*\*YiranJin

Tel: +86-311-86265625; Fax: +86-311-86266419

E-mail address: jinyiran@sohu.com

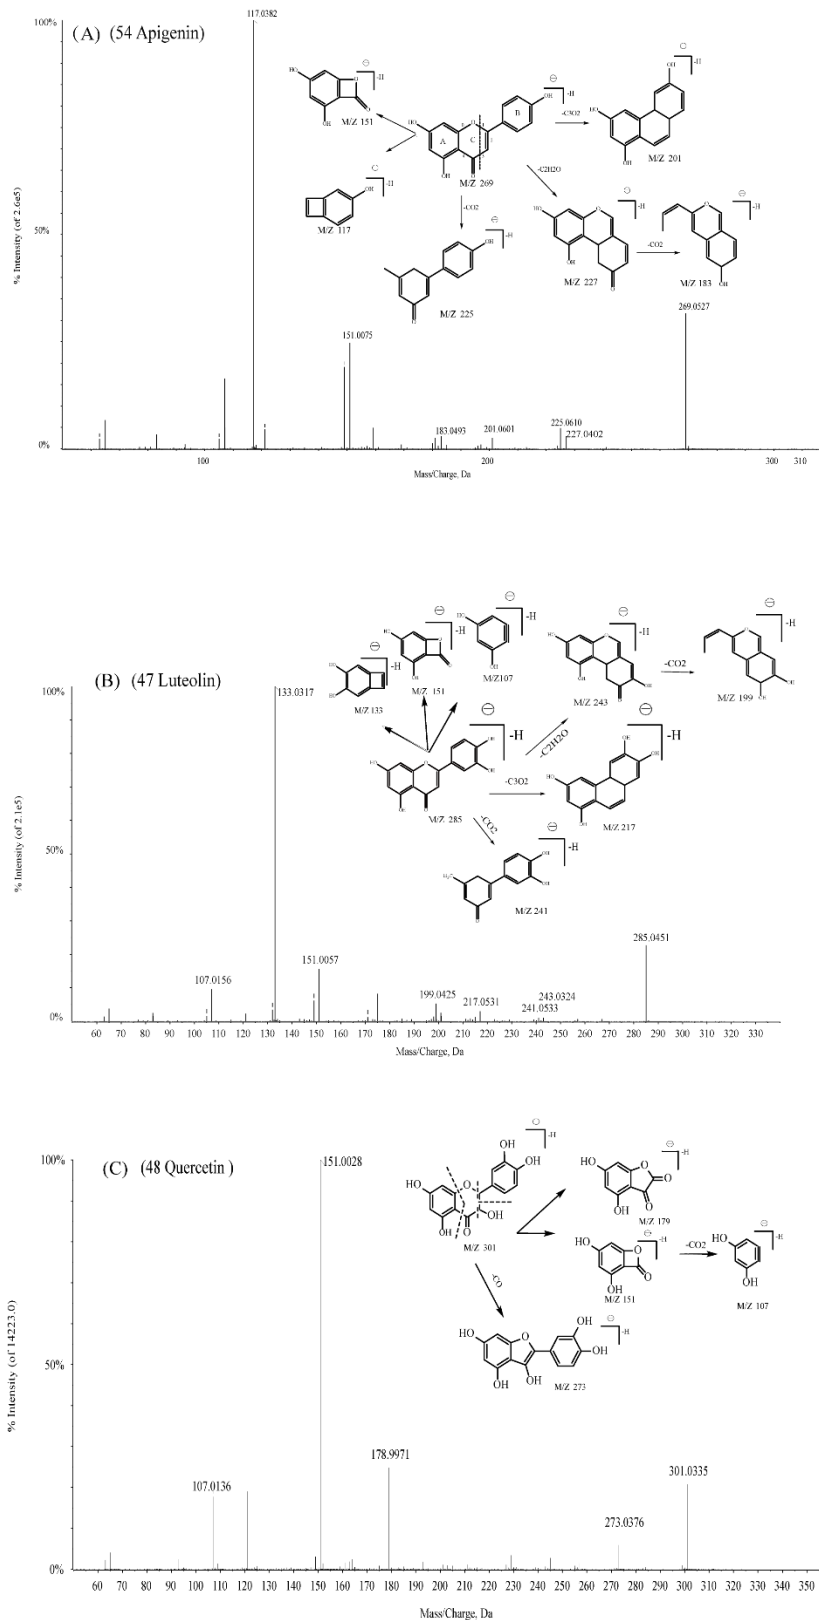

Fig.S1 The typical MS/MS spectrum of flavone/flavanone aglycones and their fragmentation pathways: (A) Apigenin, (B) Luteolin, (C) Quercetin.

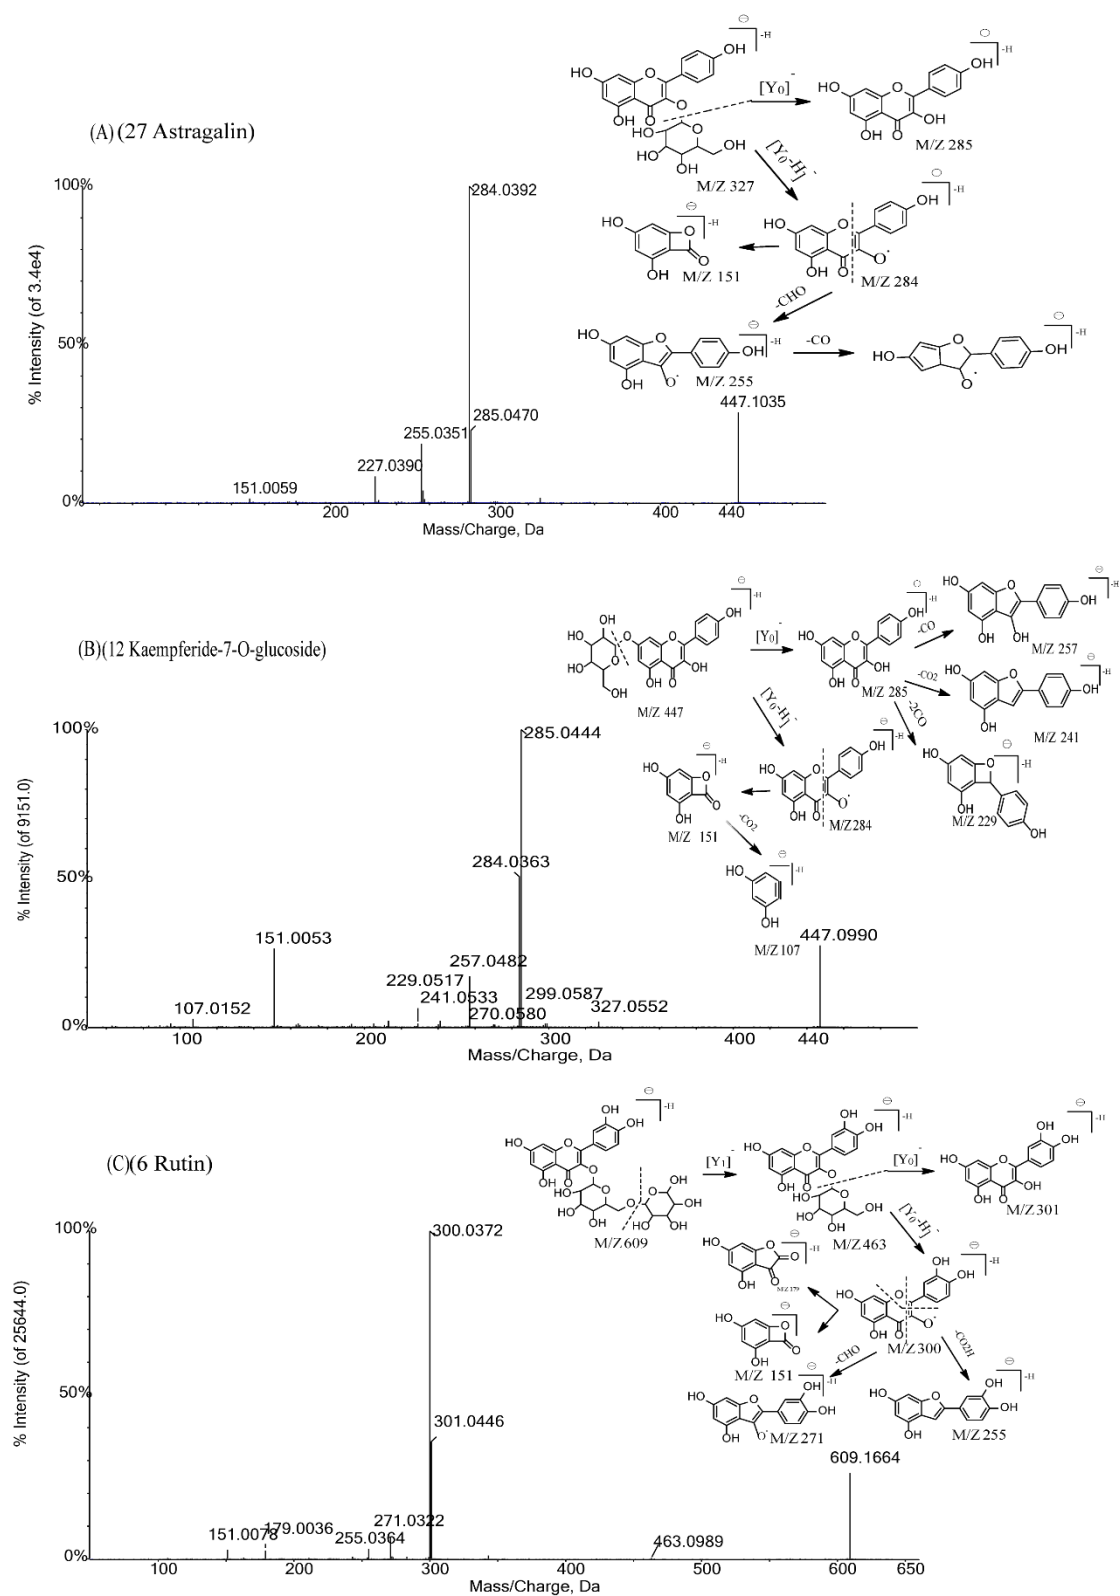

Fig. S2 The typical MS/MS spectrum of flavonoid-O-glycosides and its fragmentation pathway: (A) Astragalin, (B) Kaempferide-7-O-glucoside, (C) Rutin.

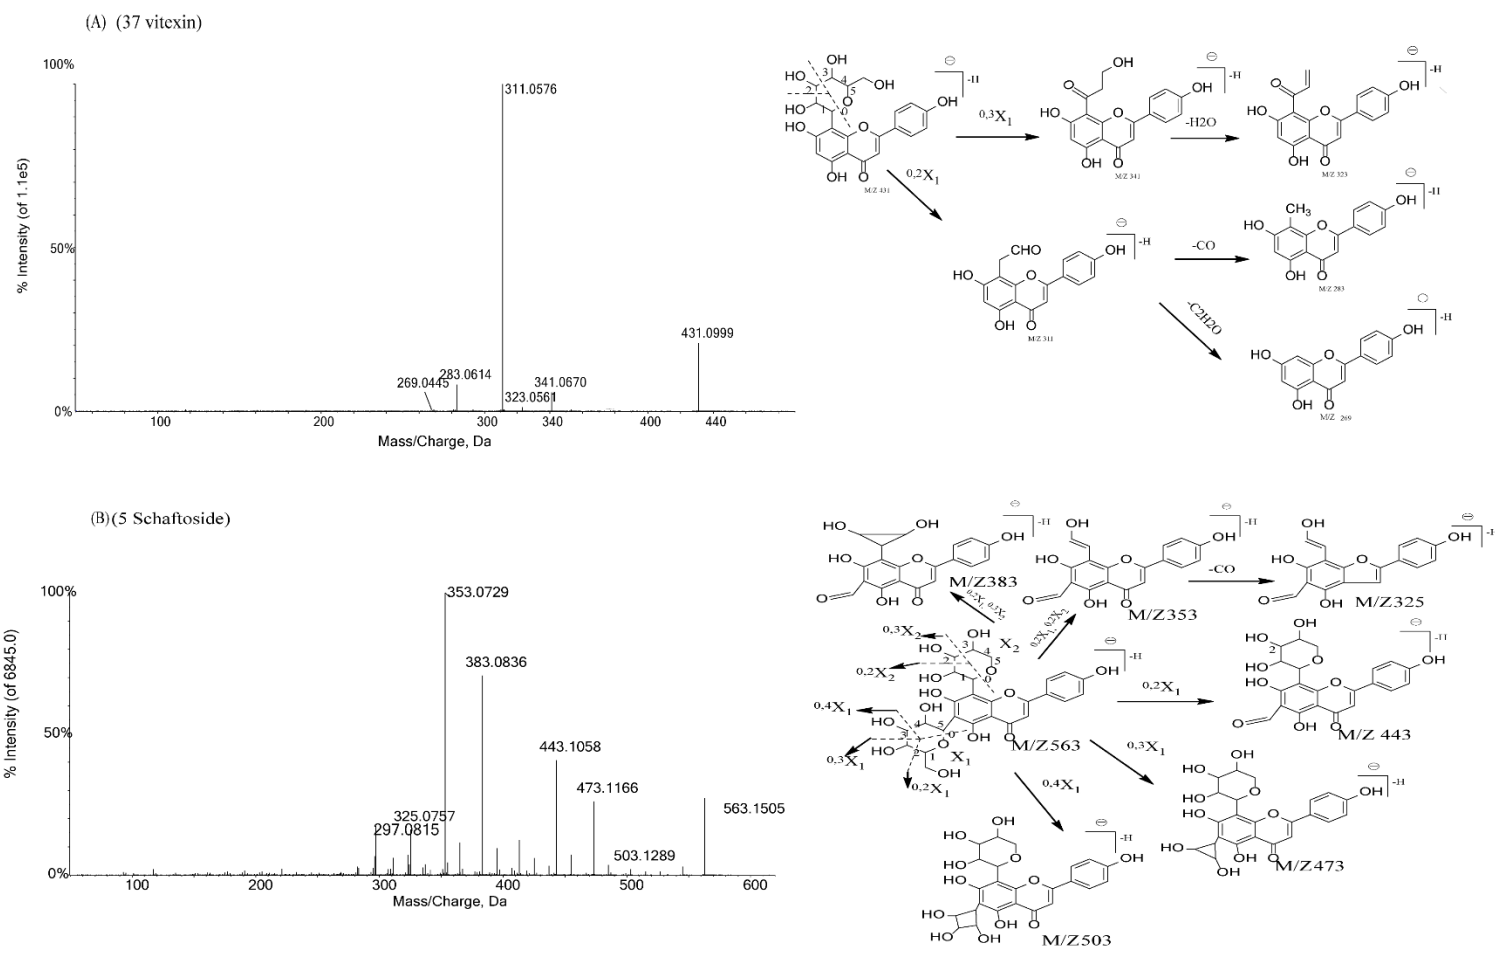

Fig.S3 The typical MS/MS spectrum of flavonoid-C-glycosides and its fragmentation pathway: (A) Vitexin, (B) Schaftosi.

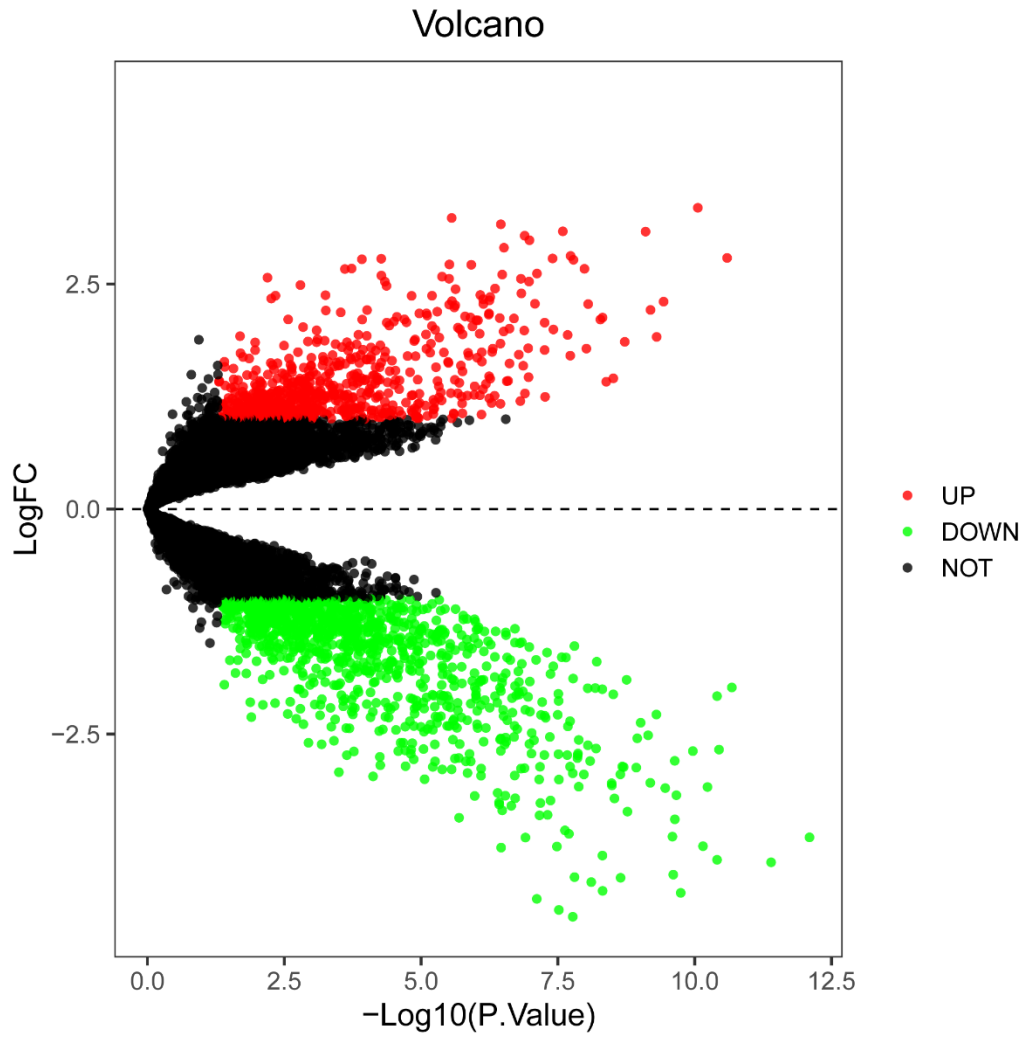

Fig.S4 The volcano map of the differential genes in healthy human liver tissue and liver cancer tissue.

**Table S1 Window distributions of variable window SWATH methods.**

| Experiment | MS Type | Min m/z | Max m/z |
|------------|---------|---------|---------|
| 0          | SCAN    | 49.5    | 999.5   |
| 1          | SWATH   | 49.5    | 69.5    |
| 2          | SWATH   | 68.5    | 72.5    |
| 3          | SWATH   | 71.5    | 86.5    |
| 4          | SWATH   | 85.5    | 107.5   |
| 5          | SWATH   | 106.5   | 115.5   |
| 6          | SWATH   | 114.5   | 129.5   |
| 7          | SWATH   | 128.5   | 136.5   |
| 8          | SWATH   | 135.5   | 159.5   |
| 9          | SWATH   | 158.5   | 173.5   |
| 10         | SWATH   | 172.5   | 180.5   |
| 11         | SWATH   | 179.5   | 191.5   |
| 12         | SWATH   | 190.5   | 241.5   |
| 13         | SWATH   | 240.5   | 279.5   |
| 14         | SWATH   | 278.5   | 285.5   |
| 15         | SWATH   | 284.5   | 287.5   |
| 16         | SWATH   | 286.5   | 353.5   |
| 17         | SWATH   | 352.5   | 474.5   |
| 18         | SWATH   | 473.5   | 490.5   |
| 19         | SWATH   | 489.5   | 592.5   |
| 20         | SWATH   | 591.5   | 999.5   |

**Table S2 Classification results of 16 unknown samples.**

| Name             | Probability | Class |
|------------------|-------------|-------|
| Unknown-1-Taiju  | 0.93333     | Taiju |
| Unknown-2-Taiju  | 0.99667     | Taiju |
| Unknown-3-Taiju  | 0.99333     | Taiju |
| Unknown-4-Taiju  | 0.99333     | Taiju |
| Unknown-5-Taiju  | 0.93333     | Taiju |
| Unknown-6-Taiju  | 0.99667     | Taiju |
| Unknown-7-Taiju  | 0.99333     | Taiju |
| Unknown-8-Taiju  | 0.99333     | Taiju |
| Unknown-9-Duoju  | 0.86667     | Duoju |
| Unknown-10-Duoju | 0.95667     | Duoju |
| Unknown-11-Duoju | 0.93333     | Duoju |
| Unknown-12-Duoju | 0.92667     | Duoju |
| Unknown-13-Duoju | 0.86667     | Duoju |
| Unknown-14-Duoju | 0.95667     | Duoju |
| Unknown-15-Duoju | 0.93333     | Duoju |
| Unknown-16-Duoju | 0.92667     | Duoju |

---

**TableS3 Results of KEGG pathway information.**

| GO       | Description                                   | Hits                                | Log(q-value) |
|----------|-----------------------------------------------|-------------------------------------|--------------|
| hsa04914 | Progesterone-mediated oocyte maturation       | CCNA2 CDK1 CDC25A PIK3R1 PLK1 CCNB3 | -10.0365     |
| hsa04110 | Cell cycle                                    | CCNA2 CDK1 CDC25A PLK1 CCNB3        | -7.3006      |
| hsa04218 | Cellular senescence                           | CCNA2 CDK1 CDC25A PIK3R1 CCNB3      | -7.00795     |
| hsa05203 | Viral carcinogenesis                          | CCNA2 CDK1 PIK3R1                   | -2.76769     |
| hsa05170 | Human immunodeficiency virus 1 infection      | CDK1 PIK3R1 CCNB3                   | -2.76769     |
| hsa04068 | FoxO signaling pathway                        | PIK3R1 PLK1 CCNB3                   | -3.18848     |
| hsa04114 | Oocyte meiosis                                | AR CDK1 PLK1                        | -3.18848     |
| hsa05207 | Chemical carcinogenesis - receptor activation | AR CDC25A PIK3R1                    | -2.76769     |
| hsa05200 | Pathways in cancer                            | AR CCNA2 PIK3R1                     | -1.64308     |
